# Supplementary material
Source: PubMed Central journal article supplement (PMC4750470)
Supplement: NIHMS755966-supplement-suppl_data.pdf [file NIHMS755966-supplement-suppl_data.pdf]

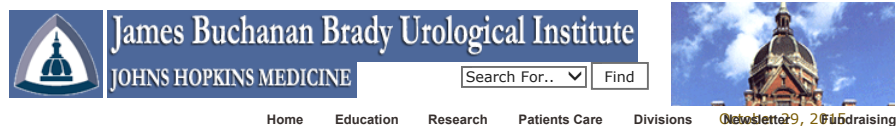

### Supplementary Table. Annual Hazard for Biochemical Progression Following Radical Prostatectomy.

| Years after RP | # at risk | # Progressions | Hazard Rate (95% CI) | Progression-free Survival Rate |
|----------------|-----------|----------------|----------------------|--------------------------------|
| 0-1            | 10609     | 520            | 5.5 (5.0-6.0)        | 0.95                           |
| 1-2            | 7764      | 288            | 3.8 (3.4-4.2)        | 0.92                           |
| 2-3            | 6231      | 220            | 3.4 (3.0-3.9)        | 0.88                           |
| 3-4            | 5128      | 158            | 2.9 (2.4-3.3)        | 0.86                           |
| 4-5            | 4309      | 111            | 2.3 (1.9-2.7)        | 0.83                           |
| 5-6            | 3666      | 97             | 2.3 (2.8-2.8)        | 0.81                           |
| 6-7            | 3137      | 65             | 1.8 (1.4-2.3)        | 0.80                           |
| 7-8            | 2694      | 59             | 1.3 (0.9-1.8)        | 0.78                           |
| 8-9            | 2292      | 37             | 0.9 (0.5-1.3)        | 0.76                           |
| 9-10           | 1910      | 22             | 1.6 (1.0-2.1)        | 0.76                           |
| 10-11          | 1591      | 31             | 1.0 (0.5-1.5)        | 0.74                           |
| 11-12          | 1314      | 17             | 0.9 (0.4-1.4)        | 0.73                           |
| 12-13          | 1081      | 13             | 0.9 (0.3-1.4)        | 0.72                           |
| 13-14          | 891       | 10             | 1.2 (0.5-1.8)        | 0.72                           |
| 14-15          | 728       | 11             | 1.2 (0.5-1.8)        | 0.70                           |
| 15-16          | 583       | 7              | 0.9 (0.2-1.6)        | 0.70                           |
| 16-17          | 480       | 8              | 1.2 (0.4-2.1)        | 0.68                           |
| 17-18          | 381       | 1              | 0.2 (0.0-0.6)        | 0.68                           |
| 18-19          | 292       | 5              | 1.3 (0.2-2.4)        | 0.67                           |
| 19-20          | 217       | 2              | 0.7 (0.0-1.7)        | 0.66                           |
| 20-21          | 148       | 0              | 0                    | 0.66                           |
| 21-22          | 101       | 0              | 0                    | 0.66                           |
| 22-23          | 54        | 1              | 1.4 (0.0-4.3)        | 0.65                           |
| 23-24          | 33        | 0              | 0                    | 0.65                           |
| 24-25          | 15        | 1              | 5.7 (0.0-16.3)       | 0.61                           |
| 25-26          | 6         | 0              | 0                    | 0.61                           |
| 26-27          | 2         | 0              | 0                    | 0.61                           |
| 27-28          | 1         | 0              | 0                    | 0.61                           |

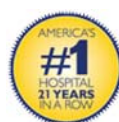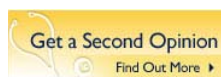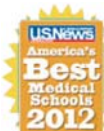

JOHNS HOPKINS  
MEDICINE

© Copyright 2015 | All Rights Reserved | Disclaimer  
Email: [webmaster@urology.jhu.edu](mailto:webmaster@urology.jhu.edu) | 600 North Wolfe Street, Baltimore, Maryland 21287
